# Supplementary material for: Methyl viologen-templated zinc gallophosphate zeolitic material with dual photo-/thermochromism and tuneable photovoltaic activity
Source: PubMed Central journal article supplement (PMC5490056; doi:10.1039/c5sc00291e), 2015-03-05
Supplement: SC-006-C5SC00291E-s001.pdf [file SC-006-C5SC00291E-s001.pdf]

## Supporting Information for

### **Methylviologen-Templated Zinc Gallophosphate Zeolitic Material with Dual Photo-/Thermochromism and Tuneable Photovoltaic Activity**

*Junbiao Wu, Chunyao Tao, Yi Li, Jiyang Li\*, Jihong Yu\**

State Key Laboratory of Inorganic Synthesis and Preparative Chemistry, College of  
Chemistry, Jilin University, Changchun 130012 (P. R. China)

*E-mail: lijyang@jlu.edu.cn; jihong@jlu.edu.cn*

**Table S1.** Crystal data and structure refinement for JU101 <sup>[a]</sup>

|                                                              |                                                                         |
|--------------------------------------------------------------|-------------------------------------------------------------------------|
| Empirical formula                                            | Ga <sub>1.67</sub> O <sub>10</sub> P <sub>2.50</sub> Zn <sub>0.83</sub> |
| Formula weight                                               | 408.10                                                                  |
| Temperature                                                  | 296(2) K                                                                |
| Wavelength(Å)                                                | 0.71073                                                                 |
| Crystal system, space group                                  | Monoclinic, <i>C2/m</i>                                                 |
| Unit cell dimensions                                         |                                                                         |
| <i>a</i> (Å)                                                 | 16.767(3)                                                               |
| <i>b</i> (Å)                                                 | 19.047(4)                                                               |
| <i>c</i> (Å)                                                 | 10.248(2)                                                               |
| <i>α</i> (deg)                                               | 90                                                                      |
| <i>β</i> (deg)                                               | 127.038(3)                                                              |
| <i>γ</i> (deg)                                               | 90                                                                      |
| Volume(Å <sup>3</sup> )                                      | 2612.4(9)                                                               |
| Z, calculated density(mg m <sup>-3</sup> )                   | 8, 2.075                                                                |
| Absorption coefficient(mm <sup>-1</sup> )                    | 5.277                                                                   |
| <i>F</i> (000)                                               | 1553                                                                    |
| Crystal size(mm <sup>3</sup> )                               | 0.22 x 0.21 x 0.18                                                      |
| <i>θ</i> range(°) for data collection                        | 1.860–28.284                                                            |
| Limiting indices                                             | -22 ≤ <i>h</i> ≤ 19, -25 ≤ <i>k</i> ≤ 25, -7 ≤ <i>l</i> ≤ 13            |
| Reflections collected/unique                                 | 9591/3334, [R(int) = 0.0442]                                            |
| Completeness to <i>θ</i> (%)                                 | 25.242, 100                                                             |
| Absorption correction                                        | semi-empirical from equivalents                                         |
| Refinement method                                            | full-matrix least-squares on <i>F</i> <sup>2</sup>                      |
| Data/restraints/parameters                                   | 3334 / 1 / 144                                                          |
| Goodness-of-fit on <i>F</i> <sup>2</sup>                     | 1.050                                                                   |
| Final <i>R</i> indices [ <i>I</i> > 2 <i>σ</i> ( <i>I</i> )] | <i>R</i> <sub>1</sub> = 0.0466, <i>wR</i> <sub>2</sub> = 0.1257         |
| <i>R</i> indices (all data)                                  | <i>R</i> <sub>1</sub> = 0.0677, <i>wR</i> <sub>2</sub> = 0.1353         |
| Largest diff. peak and hole (eÅ <sup>-3</sup> )              | 1.552 and -0.774                                                        |

<sup>a</sup>*R*<sub>1</sub> =  $\sum(\Delta F/\sum(F_o))$ , *wR*<sub>2</sub> =  $(\sum[w(F_o^2 - F_c^2)])/\sum[w(F_o^2)]^{1/2}$  and  $w=1/[s^2(F_o^2)+(0.0567P)^2+10.3802P]$  where  $P=(F_o^2+2F_c^2)/3$

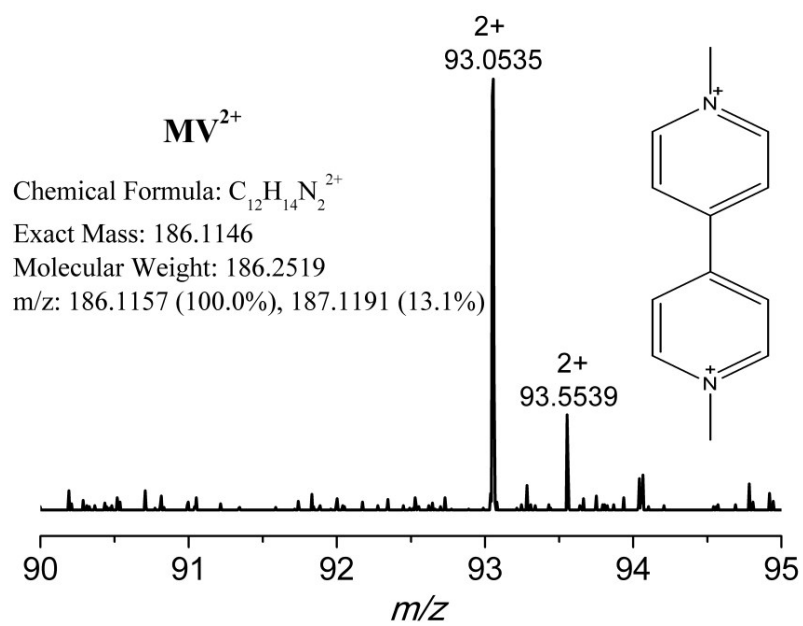

**Figure S1.** Liquid chromatography-high resolution mass spectrum (LC-HRMS) of JU101.

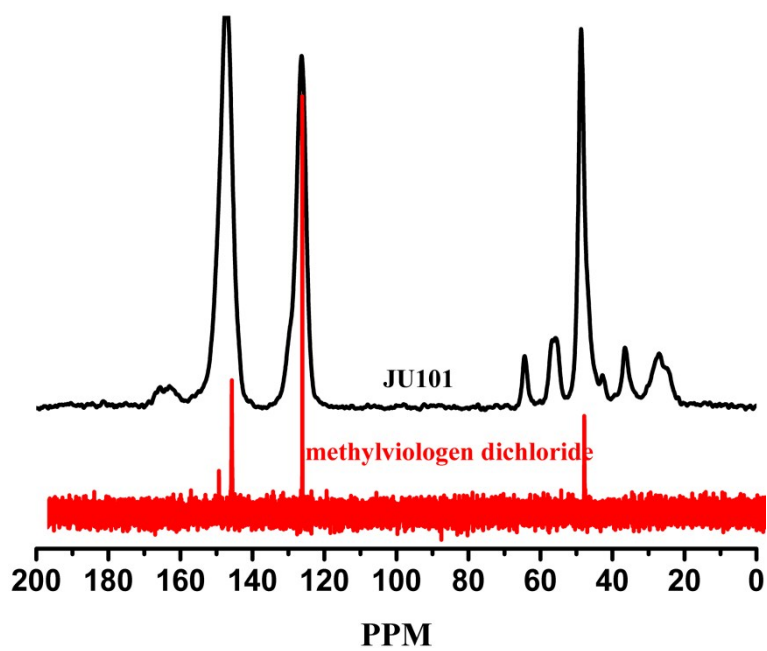

**Figure S2.** Solid-state <sup>13</sup>C MAS NMR spectrum of JU101 and liquid <sup>13</sup>C NMR of methylviologen dichloride. Their well agreement indicates that the intact MV<sup>2+</sup> cations are occluded in the structure of JU101.

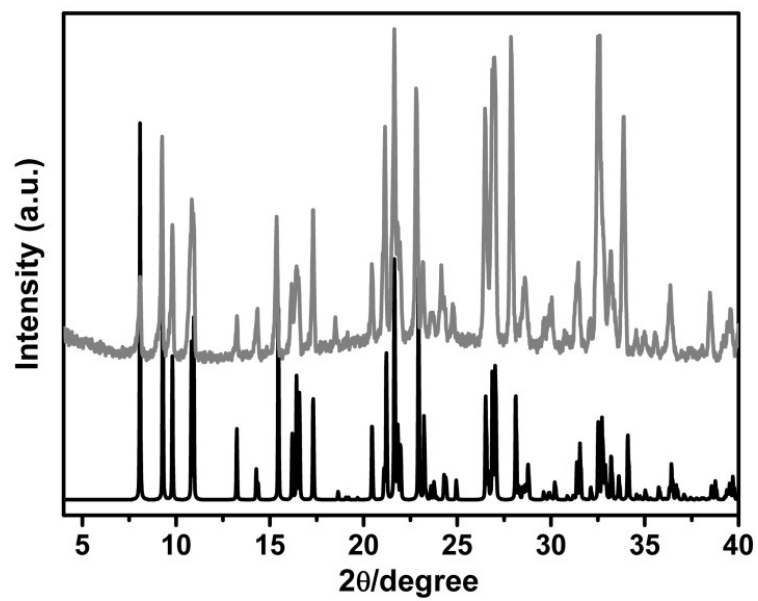

**Figure S3.** Experimental (top) and simulated (down) PXRD patterns of JU101. Their well agreement suggests the phase purity of the selected crystals.

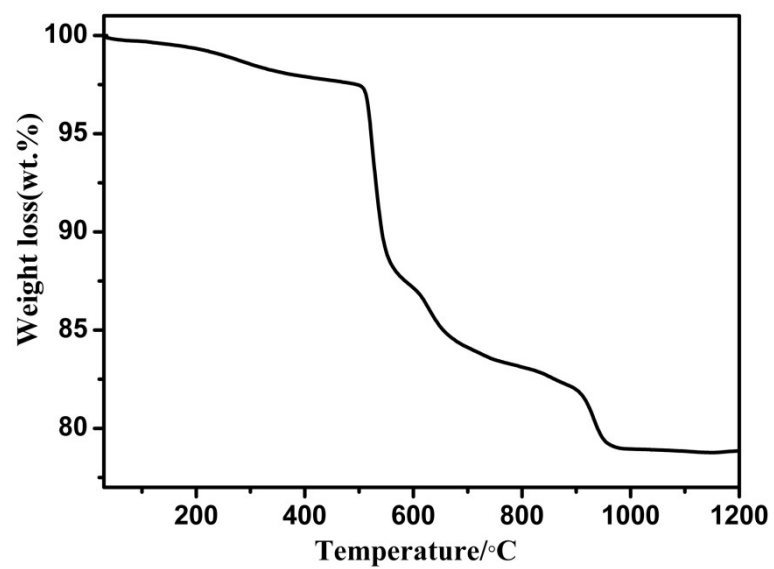

**Figure S4.** TG curve of JU101 from room temperature to 1200 °C.

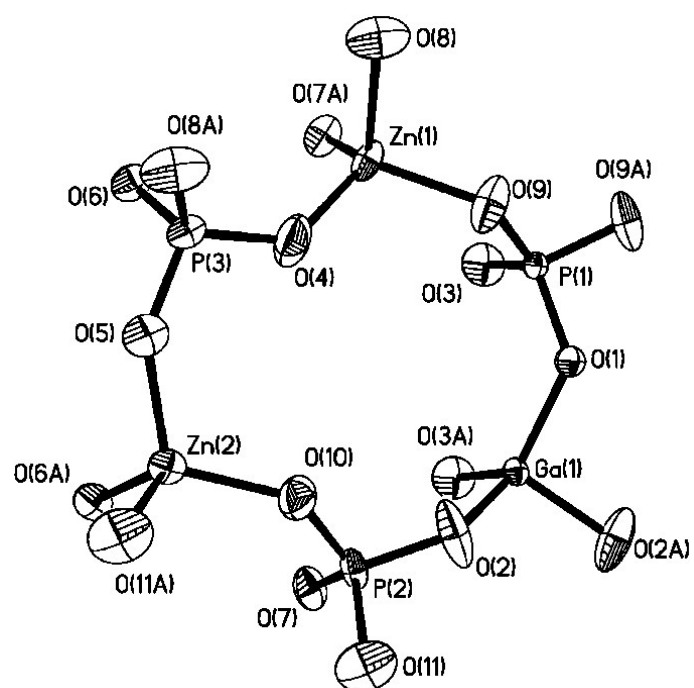

**Figure S5.** Thermal ellipsoids of JU101 given at 50% probability, showing the atomic labeling scheme (disordered  $MV^{2+}$  cations and  $F^-$  ions are not given).

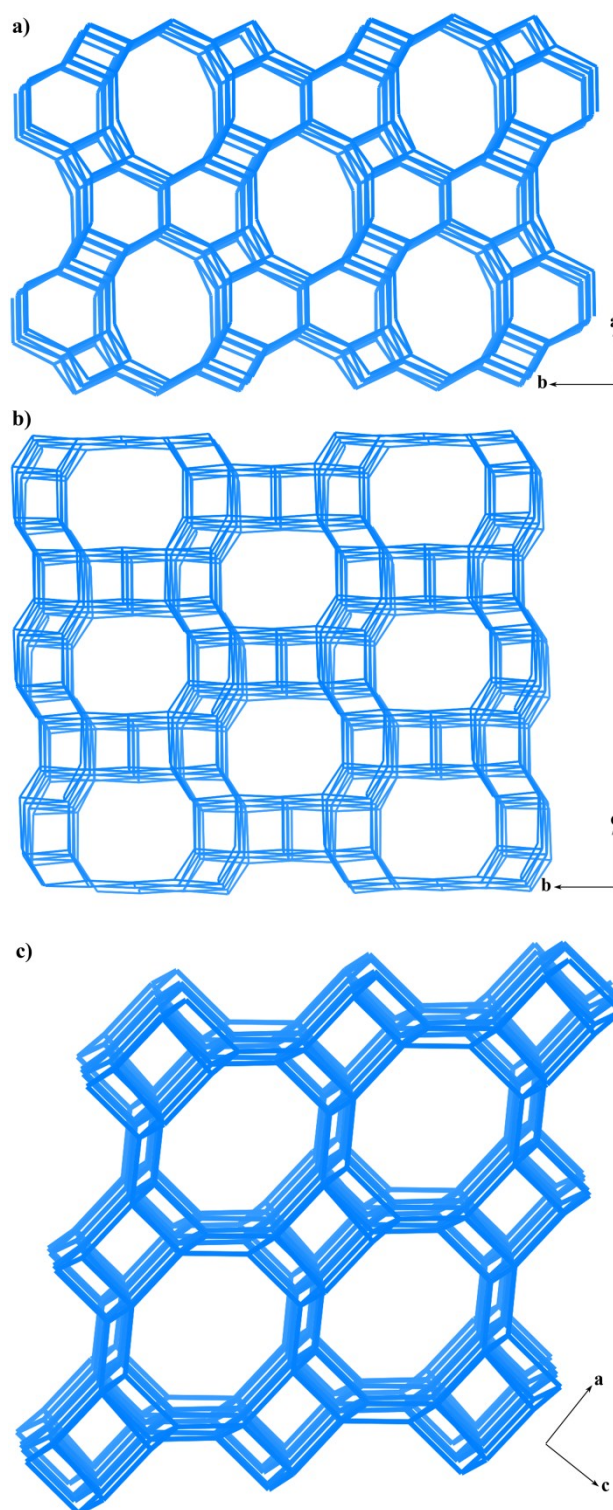

**Figure S6.** 3D channel system of JU101 composed of 10-ring channels running along the (a) [001] ( $6.4 \times 5.0 \text{ \AA}^2$ ) and (b) [100] ( $4.5 \times 3.6 \text{ \AA}^2$ ) directions, and (c) 8-ring channels running along the [010] directions ( $4.0 \times 3.9 \text{ \AA}^2$ ).



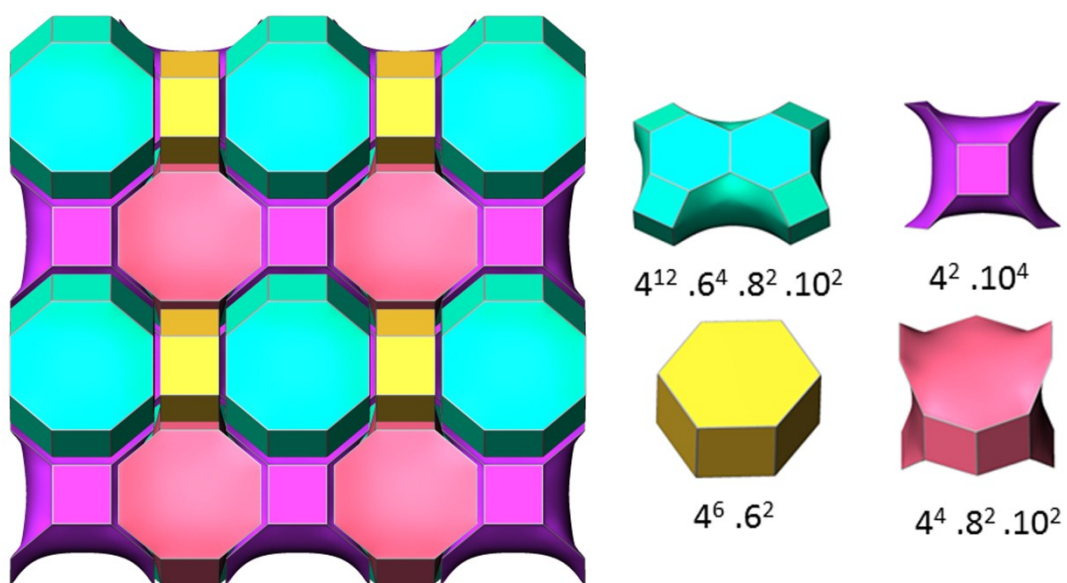

**Figure S7.** Tiling structure of JU101 viewed along the [001] directions. Four types of tiles are shown in different colors.



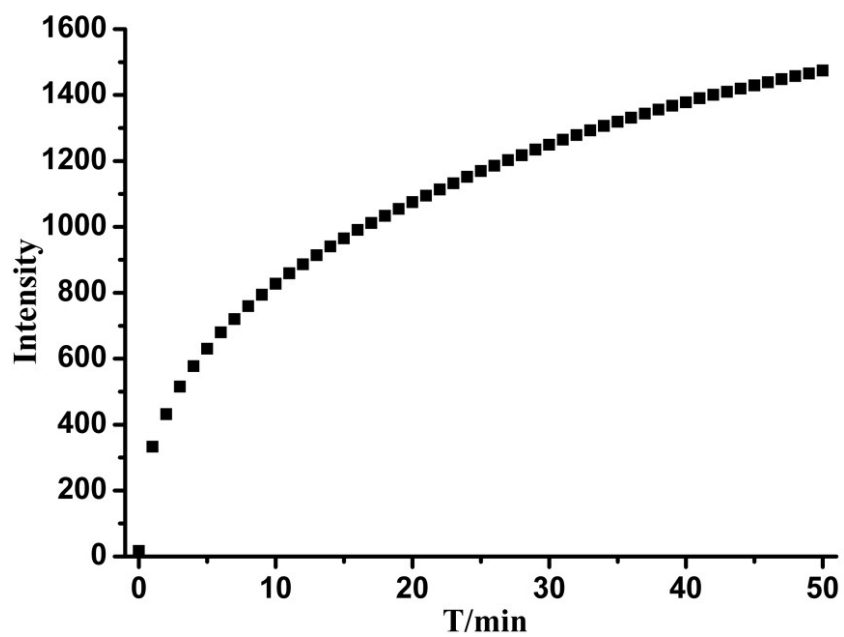

**Figure S8.** Intensity of EPR signals of JU101-P with prolonged UV irradiation time.

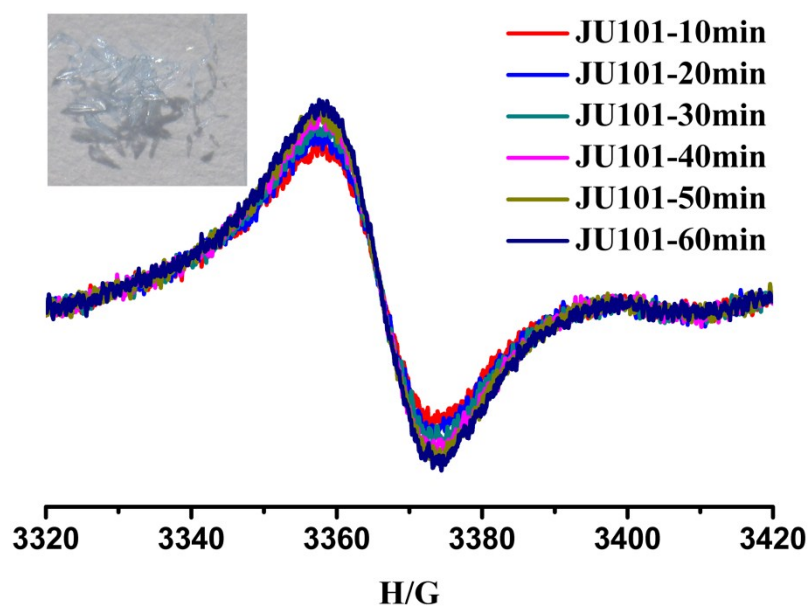

**Figure S9.** *In-situ* time dependent EPR spectra of JU101 under visible light illumination (insert is the photograph of JU101 illuminated upon visible light for 1h).

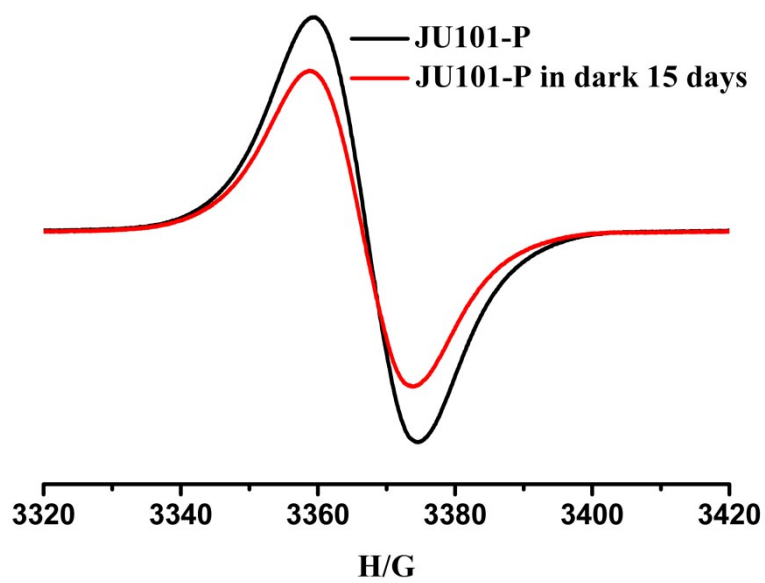

**Figure S10.** EPR signals of JU101-P and JU101-P kept in the dark for 15 days.
